# Supplementary material for: Development of an atmosphere–ocean coupled operational forecast model for the Maritime Continent: Part 1 – Evaluation of ocean forecasts
Source: Copernicus journal article supplement (doi:10.5194/gmd-2020-326), 2020-10-19
Supplement: Supplementary file [file gmd-2020-326-AC4-supplement.pdf]

**We thank the reviewer for his/her careful reading and constructive comments which helped to improve the manuscript (ms). The point-by-point replies to the reviewer's comments are provided below in bold font:**

Specific comments

1. Figure 1: Improve readability/increase font size of figure 1 labels.

**Improved figure presented in the revised version**

2. L 190: mention the mslp data source

**ECMWF IFS. A sentence added in the revised ms (L189-190).**

3. L192: Any reason for “69-month” ocean hindcast run?

**We have started the model from Jan 2014 to have spin-up period of 4 years (2014-2017) and atleast 1 year (2018) of simulation for the hindcast validation. Due to the delay in bringing the coupled system to a pre-operational forecast stage we have extended the hindcast simulations to Sep 2019. This results in total 69 months of hindcast run.**

4. Fig 3: Provide sub-region abbreviations inside the figure hence the readability can be improved.

**The abbreviations are included in the revised figure.**

5. Table 3: It will be appropriate to provide the tide-gauge locations in the figure 3.

**The tide gauge locations are included in the revised figure**

6. Figure 9a. Looks a typo in figure 9a M1 location.

**Corrected in the revised manuscript.**

7. L521: please provide a brief outlook on the analysis which will be included in the MCAao.

**Included in the revised manuscript (L520-522).**

8. L587: Update the reference, if available.

**Reference is updated.**
